# Supplementary material for: CopM is a novel copper-binding protein involved in copper resistance in Synechocystis sp. PCC 6803
Source: PubMed Central journal article supplement (PMC4335983; doi:10.1002/mbo3.231), 2014-12-26
Supplement: mbo30004-0167-sd2.pdf [file mbo30004-0167-sd2.pdf]

**Table S1. Proteins identified from the periplasmic extracts of *Synechocystis* sp. PCC 6803.**

| <b>Number</b> <sup>1)</sup> | <b>ORF</b> | <b>Gene</b>  | <b>Gene Product</b>                      | <b>Mass (kDa)</b> | <b>Score</b> |
|-----------------------------|------------|--------------|------------------------------------------|-------------------|--------------|
| 1                           | slr1751    |              | Peirplasmic C-terminal peptidase         | 46.8              | 274          |
| 2                           | slr0513    | <i>futA2</i> | Periplasmic iron-binding protein         | 38.2              | 310          |
| 3                           | slr0051    | <i>ecaB</i>  | Periplasmic beta-type carbonic anhydrase | 27.9              | 88           |

---

1) Spot numbers in Fig. S1.
