# Supplementary material for: CopM is a novel copper-binding protein involved in copper resistance in Synechocystis sp. PCC 6803
Source: PubMed Central journal article supplement (PMC4335983; doi:10.1002/mbo3.231), 2014-12-26
Supplement: mbo30004-0167-sd3.pdf [file mbo30004-0167-sd3.pdf]

Table S2. Oligonucleotides used in this work.

| <b>Name</b>      | <b>Sequence</b>                          |
|------------------|------------------------------------------|
| <b>PetEF</b>     | ACAATCCTCGCTGGCCTTCT                     |
| <b>PetER</b>     | CGACAACCTTTGCCTACCATG                    |
| <b>copM1F</b>    | AGCATTCCCATGGTAATCAATTCTGGATAT           |
| <b>copM1R</b>    | CATCTCGAGTCACTGACCATAACCAGTTTTGATA       |
| <b>copBF</b>     | AAGTCAATCGGCTCAGTCTG                     |
| <b>copBR</b>     | GTAACGACTTTGGGTTCTC                      |
| <b>copRF</b>     | GTGGTAGTAACGCCAGATA                      |
| <b>copRR</b>     | CTAAGCCATACACAGTTTC                      |
| <b>NY2</b>       | GCCGTTGCTAATAATTGACCG                    |
| <b>glnNF</b>     | CAATCAGTTCACCAAATCATCAAT                 |
| <b>glnNR</b>     | ACATTTCTGGTAGGTAGGCAGG                   |
| <b>pGSF</b>      | GGTACCTACTTGCGGGTTGGGTATGGTC             |
| <b>pGSR</b>      | CAGAATTGATTACCCACTTTTTCTCCTTAGTGCAGTC    |
| <b>pCOPMF</b>    | GACTGCACTAAGGAGAAAAAGTGGTAATCAATTCTGGATA |
| <b>pCOPMR</b>    | GGTACCCATGCTTCCTCACTGACCATAC             |
| <b>Gcop-1</b>    | GGTATCACCTCGATAACCCCTG                   |
| <b>Gcop-2</b>    | CACCAGCAACAGTCTCATGGGAATGCTTACCTCCTA     |
| <b>Gcop-3</b>    | ATGAGACTGTTGCTGGTGGA                     |
| <b>Gcop-4</b>    | ATTGACGGTACCGATATCCTGTTAGGTGAGA          |
| <b>all4988F</b>  | TTGTAGTGATGACATCCC                       |
| <b>all4988R</b>  | TCCATGCTGTGATCATGA                       |
| <b>all7633F</b>  | TTGTCATTGACTTTGGTAGCG                    |
| <b>all7633R</b>  | ATGATTCATCATACCGTCAT                     |
| <b>all7594F</b>  | TAACGCACAAGCACAGGTTT                     |
| <b>all7594R</b>  | GCCATTTCCATTGCTTGAGT                     |
| <b>Ana_rnpBF</b> | GCAGACCAGTTAGCTTAACTG                    |
| <b>Ana_rnpBR</b> | CTTTACACGAGGGCGATTATC                    |
